# Supplementary material for: pH-Switchable IFT variations and emulsions based on the dynamic noncovalent surfactant/salt assembly at the water/oil interface
Source: Royal Society of Chemistry journal article supplement (doi:10.1039/c9sm00891h), 2019-01-01
Supplement: c9sm00891h1.pdf [file c9sm00891h1.pdf]

## Electronic Supplementary Information

The detailed calculation processes of the  $ODA^+$  and  $ODA^{2+}$  concentrations via the potentiometric titration:

For the ODA solutions in the presence of different  $H^+$  concentrations, there were two ionization equations:

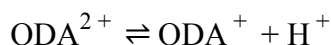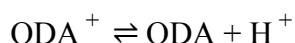

Because there was no precipitate in all solutions ( $r = 1:1.5, 1:2$  and  $1:4$ ,  $[ODA] = 250$  mg/L), the first step should be dominant, whose equilibrium constant should be:

$$K_a = \frac{[ODA^+][H^+]}{[ODA^{2+}]}$$

(1)

The potentiometric titration was employed to determine the equilibrium constant of ODA. When the NaOH solution (its volume and concentration are  $V_0$  and  $C_0$ , respectively) was added to the  $ODA^{n+}$  solution (its volume and concentration are  $V_1$  and  $C_1$ , respectively), the  $ODA^+$  and  $ODA^{2+}$  concentrations could be obtained by the following equation:

$$[ODA^+] = c_1 \frac{V_1}{V_1 + V_0}$$

(2)

$$[ODA^{2+}] = c_0 \frac{V_0}{V_0 + V_1} - c_1 \frac{V_1}{V_1 + V_0}$$

(3)

The solution pH was measured to calculate the  $H^+$  concentration:

$$[H^+] = 10^{-pH}$$

(4)

The obtained  $[ODA^+]$ ,  $[ODA^{2+}]$ , and  $[H^+]$  were substitute into equation (1),

$$K_a = 2.84464623 \times 10^{-5}$$

Based on the equation (1),

$$[ODA^+] = K_a \frac{[ODA^{2+}]}{[H^+]} \quad (5)$$

And another equation,

$$[ODA^+] + [ODA^{2+}] = 1.2485 \text{ mmol/L (250 mg/L)} \quad (6)$$

Finally, we could calculate the  $[ODA^+]$  and  $[ODA^{2+}]$  at different pH values (Table S1).

Table S1 The  $ODA^+$  and  $ODA^{2+}$  concentrations at different ODA:HCl molar ratios

| ODA:HCl<br>molar ratio | $ODA^+$ concentration<br>(mmol/L) | $ODA^{2+}$ concentration<br>(mmol/L) |
|------------------------|-----------------------------------|--------------------------------------|
| 1:1.5                  | 0.8655                            | 0.3830                               |
| 1:4                    | $1.398 \times 10^{-2}$            | 1.2345                               |
